# Supplementary material
Source: HighWire-hosted journal article supplement (https://bmjopen.bmj.com/content/8/5/e019166)
Supplement: inline-supplementary-material-1 [file inline-supplementary-material-1.pdf]

Supplement Table 1 Receiver operating characteristics curves area under the curve (AUC) for categorical anthropometric measures

|                   | Finnish (n=887)  |                 | Russian (n=344)  |                 | Somali (n=225)   |                 | Kurdish (n=348)  |                 |
|-------------------|------------------|-----------------|------------------|-----------------|------------------|-----------------|------------------|-----------------|
|                   | AUC (95% CI)     | <i>p</i> -value |
| BMI <sup>a</sup>  | 0.73 (0.66-0.79) | 0.006           | 0.74 (0.62-0.87) | 0.873           | 0.67 (0.57-0.77) | 0.421           | 0.61 (0.51-0.71) | 0.226           |
| WC <sup>b</sup>   | 0.75 (0.69-0.81) | 0.404           | 0.76 (0.67-0.86) | 0.874           | 0.71 (0.61-0.81) | 0.964           | 0.67 (0.58-0.77) | 0.248           |
| WHR <sup>c</sup>  | N/A              | N/A             | 0.68 (0.58-0.78) | 0.348           | 0.65 (0.55-0.75) | 0.229           | 0.54 (0.47-0.61) | 0.025           |
| WHtR <sup>d</sup> | 0.77 (0.72-0.83) | ref.            | 0.75 (0.61-0.90) | ref.            | 0.71 (0.61-0.80) | ref.            | 0.64 (0.55-0.74) | ref.            |

95% CI, 95% Confidence interval; BMI, Body mass index; WC, waist circumference; WHtR, waist-to-height ratio; WHR, waist-to-hip ratio.

<sup>a</sup>BMI categories: normal BMI < 25 kg/m<sup>2</sup>, overweight 25-29.9 kg/m<sup>2</sup>, obese ≥ 30 kg/m<sup>2</sup>;

<sup>b</sup>WC categories: normal WC < 94 cm (men)/ < 80 cm (women), overweight 94-102 cm (men)/ 80-88 cm (women), obese > 102 cm (men)/ > 88 cm (women);

<sup>c</sup>WHtR categories: normal < 0.50; overweight 0.50-0.59; obese ≥ 0.60;

<sup>d</sup>WHR categories: normal < 90 (men)/ < 0.85 (women), obese ≥ 90 (men)/ ≥ 0.85 (women).
